# Supplementary material
Source: PubMed Central journal article supplement (PMC5155345)
Supplement: supp_tpc.16.00481_TPC2016-00481-RAR1_Supplemental_Data.pdf [file supp_tpc.16.00481_TPC2016-00481-RAR1_Supplemental_Data.pdf]

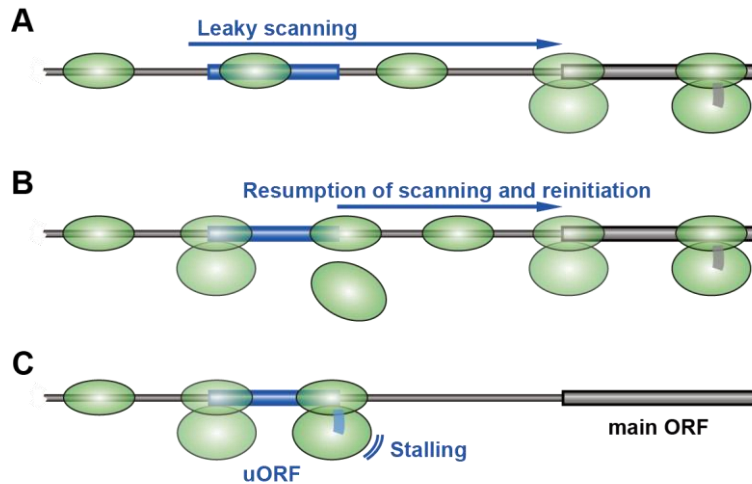

### Supplemental Figure 1. General Effects of uORF on Translation of the Main ORF.

**(A)** Translation of the main ORF by leaky scanning at the uORF. AUG codon of the uORF is not recognized by the scanning 40S subunit (the 43S preinitiation complex), and the main ORF is translated.

**(B)** Translation of the main ORF by reinitiation of translation. After translation of uORF, 80S ribosome dissociates into 60S and 40S subunits, but the 40S subunit occasionally remains on the mRNA. In yeast, this process is reported to be more efficient in short uORFs than in longer ones (Rajkowitsch et al., 2004). The 40S subunit remaining on the mRNA resumes scanning for the downstream AUG codon, and reinitiate translation at the main ORF. The efficiency of reinitiation is higher if the spacer (the distance between the stop codon of the uORF and the AUG codon of the main ORF) is longer (Child et al., 1999; Zhou et al., 2010).

**(C)** If a ribosome stalls during translation of the uORF or at the stop codon of the uORF, translation of the main ORF is strongly inhibited.

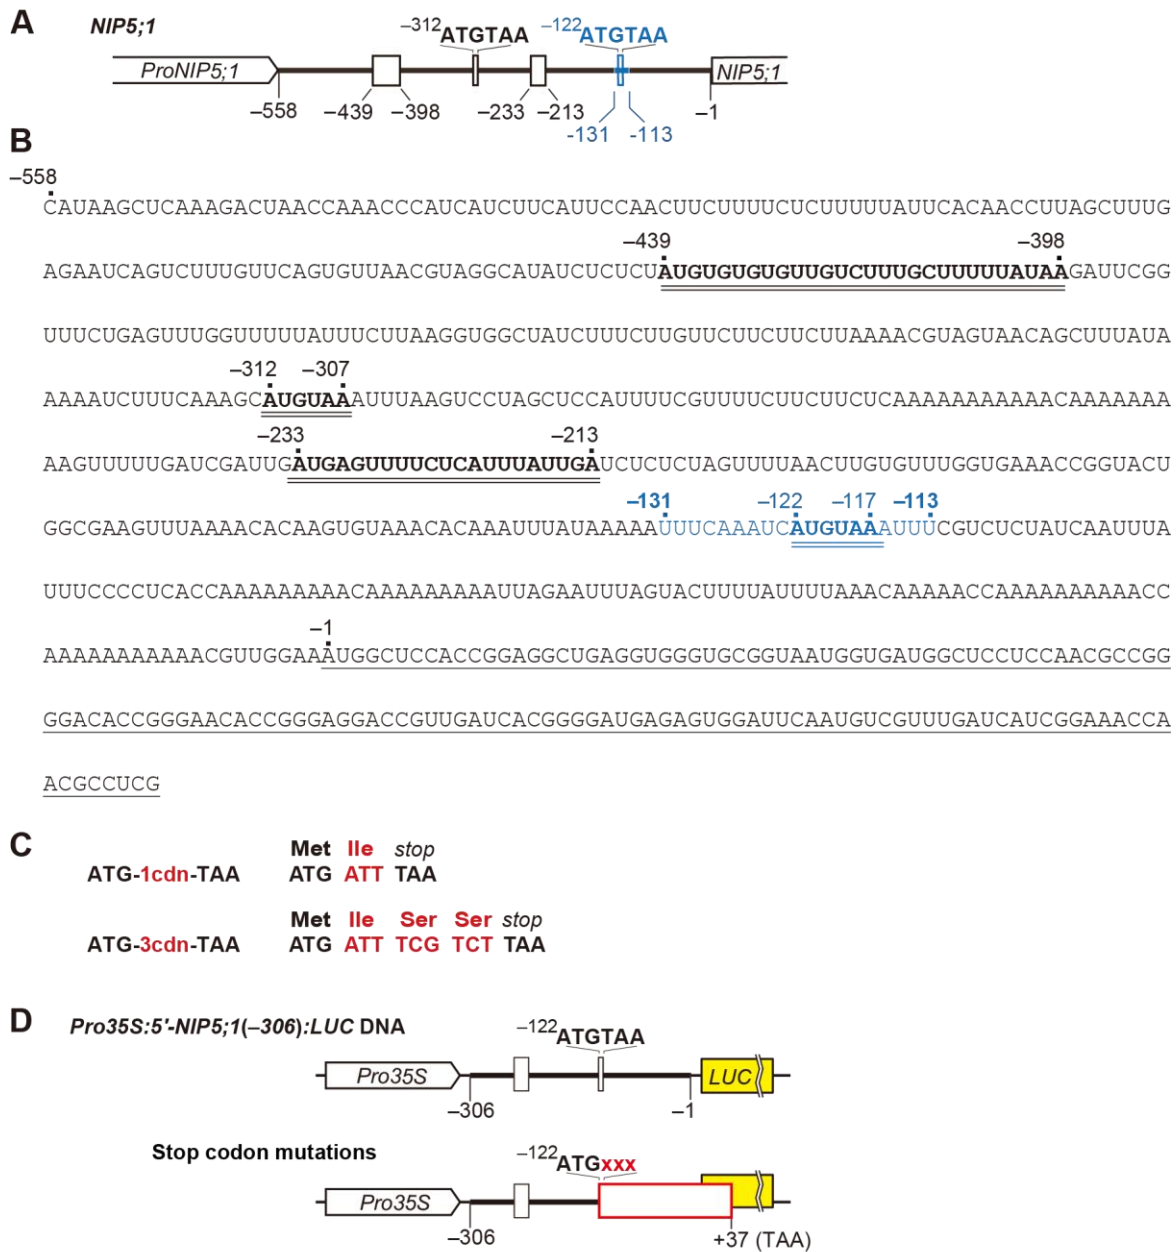

**Supplemental Figure 2. Positions of uORFs, RNA Sequence of *NIP5;1* 5'-UTR and a Portion of *NIP5;1* Coding Region.**

(A) Schematic representation of the *NIP5;1* 5'-UTR with positions of uORFs. Thick line represents 5'-UTR of *NIP5;1*. Open boxes represent uORFs. *NIP5;1* 5'-UTR contains four uORFs, including <sup>-312</sup>AUG-stop and <sup>-122</sup>AUG-stop. Nucleotide numbers are relative to the translation start site (+1).

(B) *NIP5;1* 5'-UTR sequence. uORFs are marked with double-underline and bold-face letters. The main ORF of *NIP5;1* is underlined. The blue bar/box in (A) and blue letters in (B) mark the region required for *NIP5;1* mRNA destabilization that we previously reported (Tanaka et al., 2011), which contains <sup>-122</sup>AUG-stop.

(C) Nucleotide and amino acid sequences of ATG-1cdn-TAA and ATG-3cdn-TAA constructs used in Figure 1B.

(D) Schematic representation of the stop codon mutations used in Figure 1B. The ORF started at <sup>-122</sup>AUG is extended into the LUC reporter ORF in a different reading frame from the *LUC* ORF.

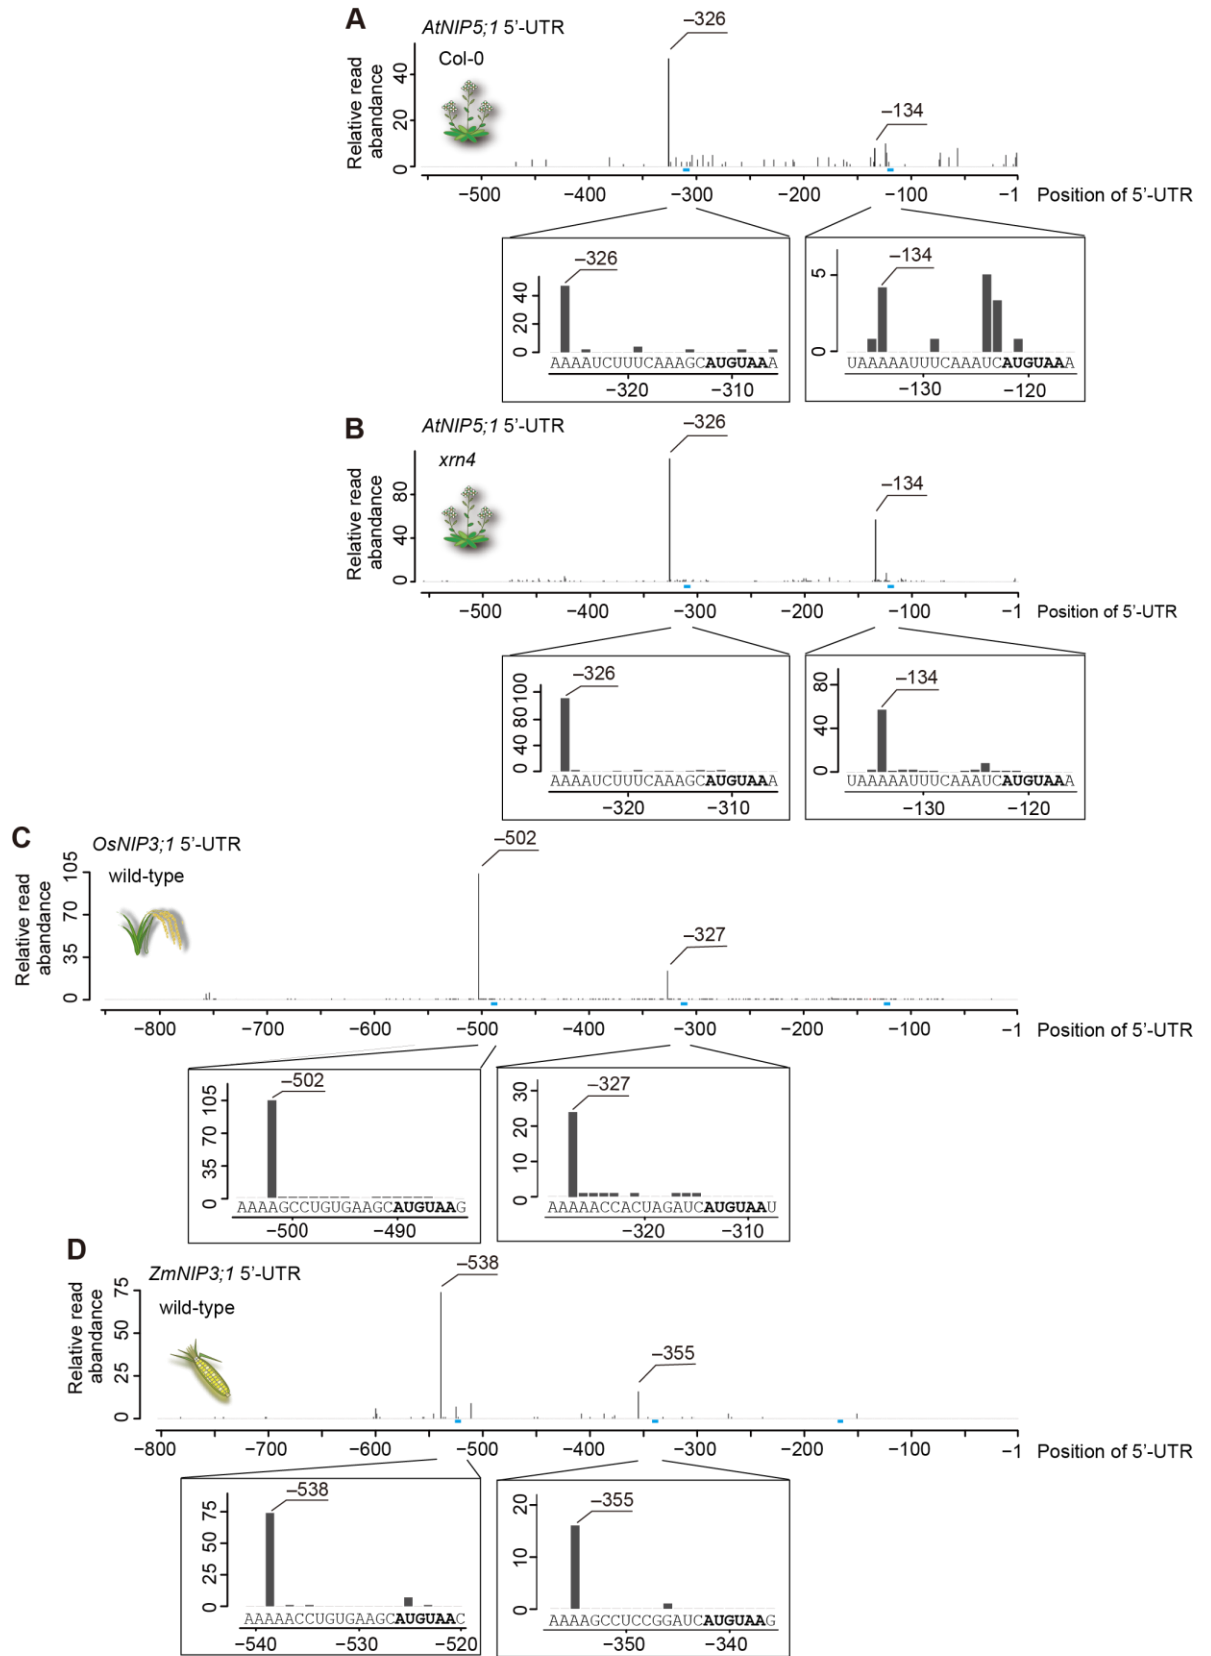

**Supplemental Figure 3. Position of 5'-Ends of mRNA Decay Intermediates in 5'-UTRs of *NIP5;1* and Its Rice and Maize Orthologs.**

**(A) to (D)** Degradome datasets available at PARE database were analysed. The raw data were normalized to transcripts per 10 million and shown as relative read abundance. Blue bars represent the position of AUGUAA sequence. **(A)** and **(B)** *Arabidopsis NIP5;1* data for inflorescence tissues of wild-type (Col-0) **(A)** and *xrn4* mutant plants **(B)** grown on soil conditions (German et al., 2008). The plots show the distribution of mRNA decay intermediates in the 5'-UTR of *NIP5;1* (-1 to -558 nt). **(C)** and **(D)** Degradome datasets for *OsNIP3;1* in rice seedlings grown on hydroponic culture for 3 weeks (Li et al., 2010) **(C)** and for *ZmNIP3;1* in ears of maize grown in a controlled environment until ears are developed (Liu et al., 2014) **(D)**. The plots show the distribution of mRNA decay intermediates in the 5'-UTRs of *OsNIP3;1* (-1 to -859 nt) and *ZmNIP3;1* (-1 to -812 nt).

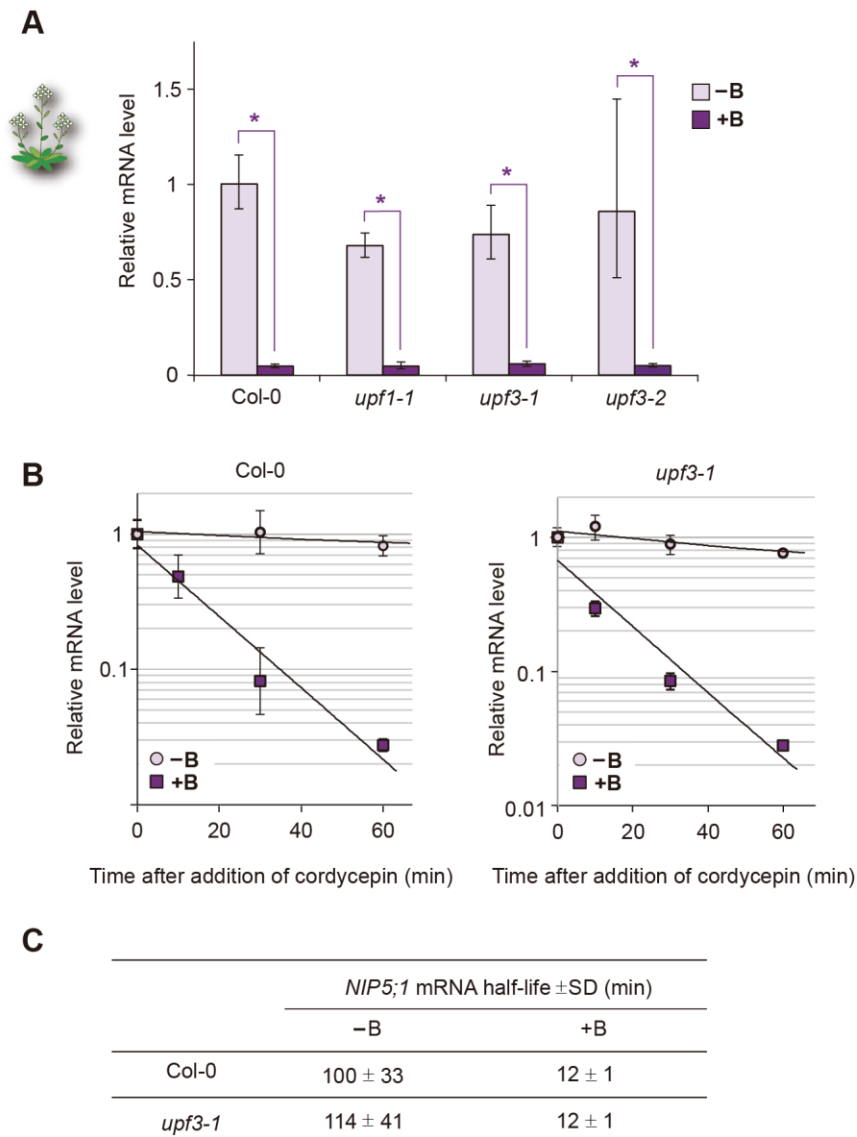

**Supplemental Figure 4. B-Dependence of *NIP5;1* mRNA Accumulation and Half-Lives in NMD Mutants.**

**(A)** mRNA accumulation of wild-type and NMD mutant, *upf1-1*, *upf3-1* and *upf3-3*, plants grown for 10 days under 100  $\mu$ M B (+B) and 0.3  $\mu$ M B (-B) conditions. Means  $\pm$  SD of relative mRNA accumulation (n = 3) are shown. Asterisks indicate significant reduction under +B condition (p < 0.05).

**(B)** mRNA degradation of wild-type and *upf3-1* mutant plants grown on solid media containing 0.3  $\mu$ M B for 10 days. Plants were then transferred to hydroponic culture medium containing 100  $\mu$ M B or 0.3  $\mu$ M B conditions for 10 min, and then cordycepin, an inhibitor of transcription, was applied. Root samples were harvested 0, 10, 30, and 60 min after cordycepin application, and mRNA levels were measured by qRT-PCR. *NIP5;1* mRNA levels after cordycepin application were normalized to those at t=0. Means  $\pm$  SD of relative mRNA accumulation (n = 3) are shown.

**(C)** *NIP5;1* mRNA half-lives were determined by linear regression of log-converted relative mRNA amounts.

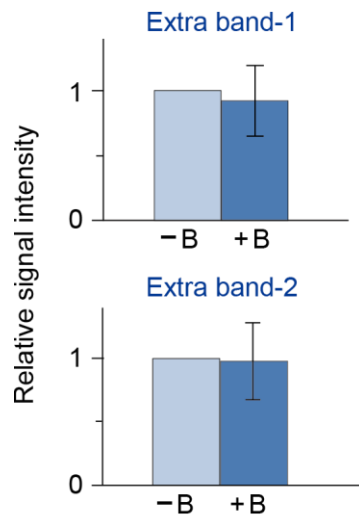

**Supplemental Figure 5. The Extra Bands in Primer Expression Assay Do Not Respond to B Conditions.**

The intensities of the extra bands relative to the -B conditions are presented after normalizing the signal intensities with those of the full-length mRNA. Means  $\pm$  SD are shown (n = 3).

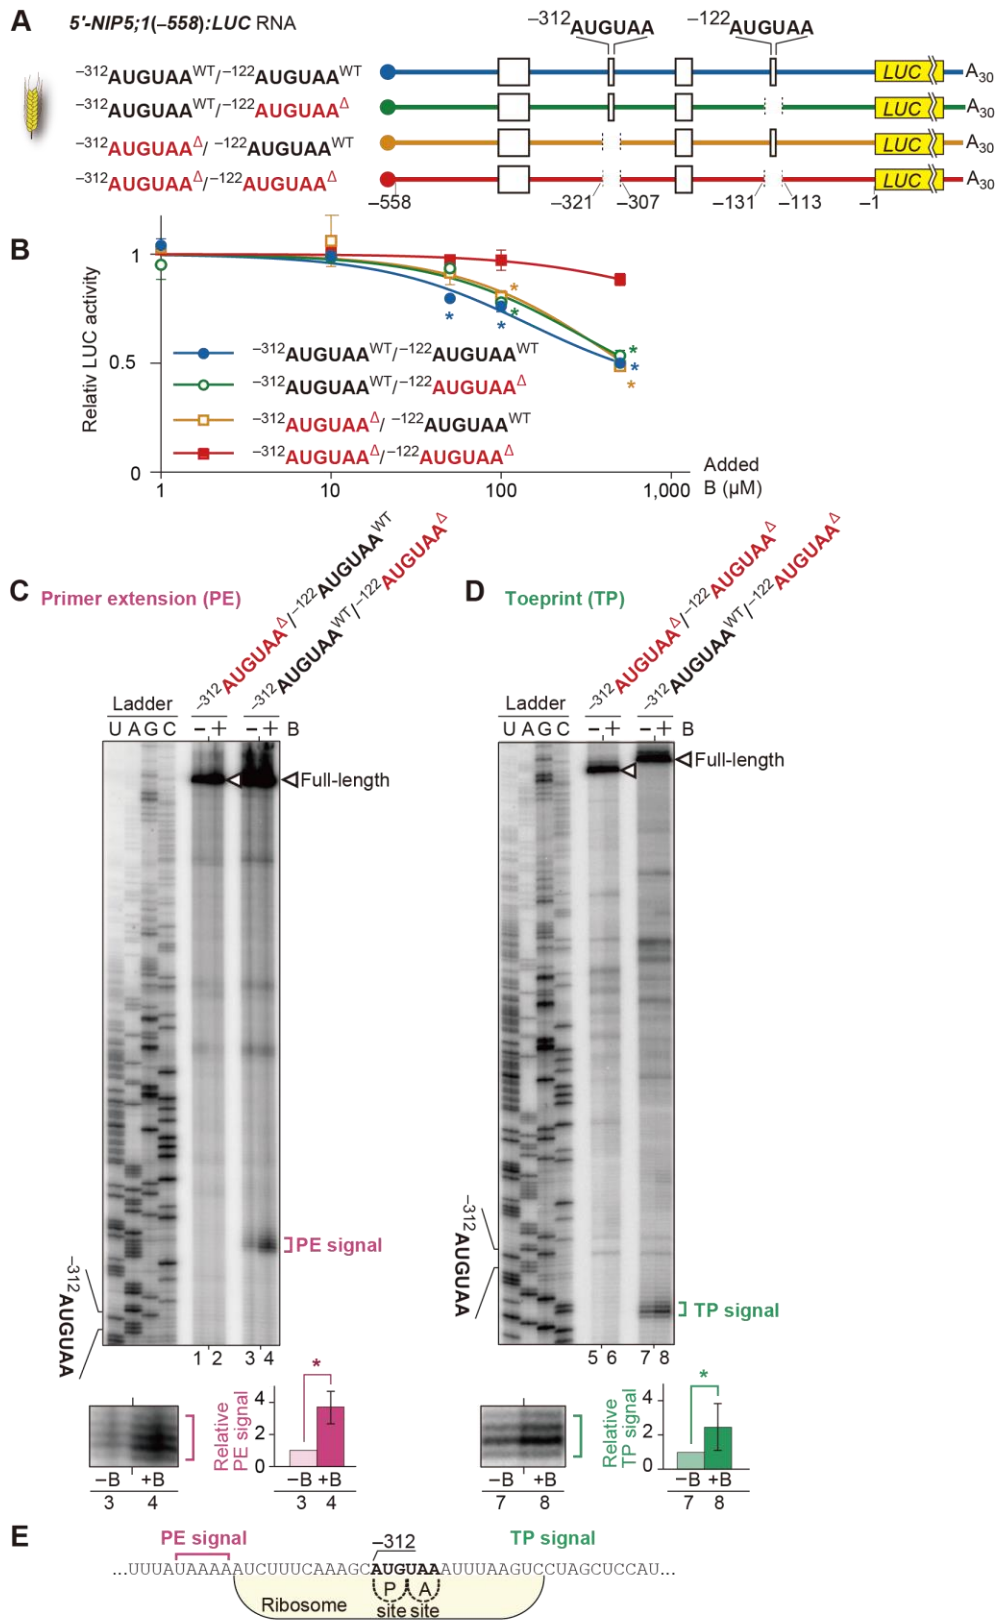

**Supplemental Figure 6. Both <sup>-312</sup>AUG-Stop and <sup>-122</sup>AUG-Stop Are Responsive to B in WGE In Vitro Translation System.**

**(A)** Schematic representations of 5'-*NIP5;1(-558):LUC* RNA and its mutants in which <sup>-312</sup>AUGUAA and/or <sup>-122</sup>AUGUAA was deleted. Open boxes represent uORFs.

**(B)** RNAs were used for WGE in vitro translation assays at various B concentrations. Means ± SD of relative LUC activities (n = 3) are shown. Asterisks indicate significant reduction of relative reporter activities compared with <sup>-312</sup>ATGTAA<sup>Δ</sup>/<sup>-122</sup>ATGTAA<sup>Δ</sup> (p < 0.05).

**(C)** and **(D)** Primer extension (PE) **(C)** and toeprint (TP) **(D)** analyses after in vitro translation in WGE with 300 μM B (+B) or without B supplementation (-B). Primer-2 (Supplemental Table 4) was used. Open arrowheads mark 5'-ends of the full-length RNA. Magenta and green brackets mark the PE and TP signals, respectively. The PE and TP signals are enlarged and their intensities relative to the -B conditions are presented after normalizing the signal intensities with those of the full-length mRNA. Means ± SD are shown (n = 3). Asterisks indicate significant difference (p < 0.05).

**(E)** Nucleotide sequence around <sup>-312</sup>AUG-stop. Positions of PE (magenta) and TP signals (green) are marked. Ribosome occupation of RNA with AUG codons positioned at the P-site is shown.



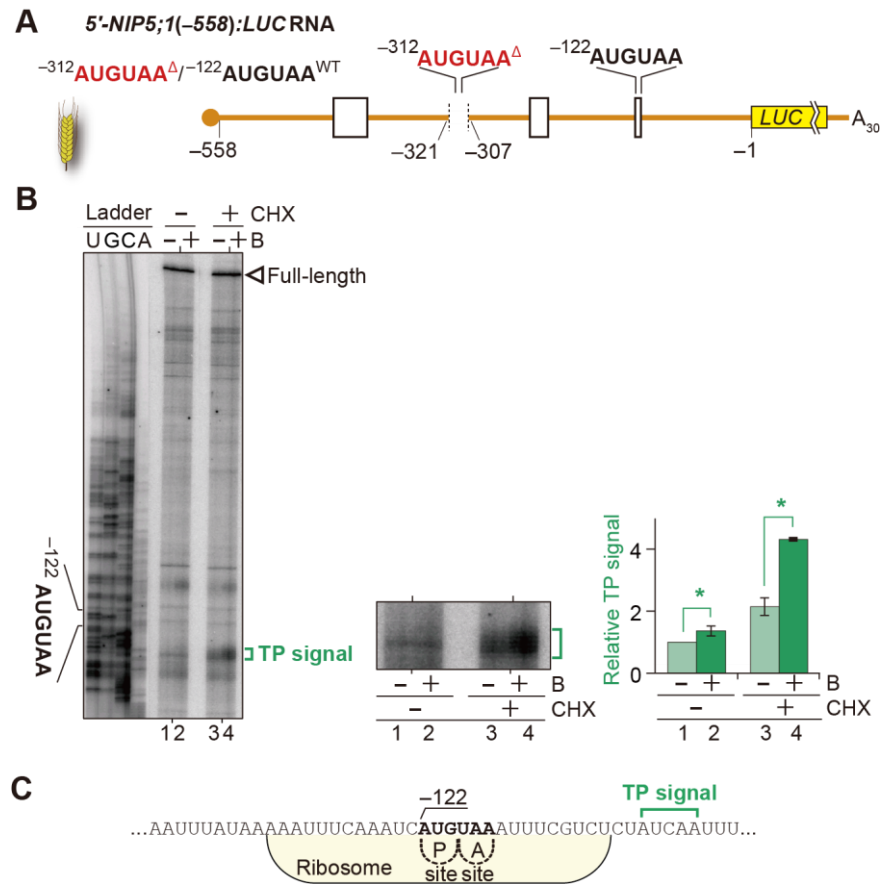

**Supplemental Figure 7. B-Dependent Toeprint Signals Are Strengthened by CHX Treatment.**

**(A)** Schematic representations of 5'-NIP5;1(-558):LUC RNA carrying deletion of <sup>-312</sup>AUG-stop (<sup>-312</sup>ATGTAA<sup>Δ</sup>/<sup>-122</sup>ATGTAA<sup>WT</sup>). Open boxes represent uORFs.

**(B)** Toeprint (TP) analyses after in vitro translation in WGE with 300 μM B (+B) or without B supplementation (-B) for 30 min. For the +CHX samples, CHX was added after the translation reaction. Open arrowheads mark 5'-ends of the full-length RNA. Green bracket marks the TP signals. The TP signals are enlarged and their relative signal intensities normalized with -B condition are shown. Means ± SD are shown (n = 3). Asterisks indicate significant difference (p < 0.05). Nucleotide sequence around <sup>-122</sup>AUG-stop with positions of TP signals (green) are marked. Ribosome occupation of RNA with AUG codon positioned at the P-site is shown.

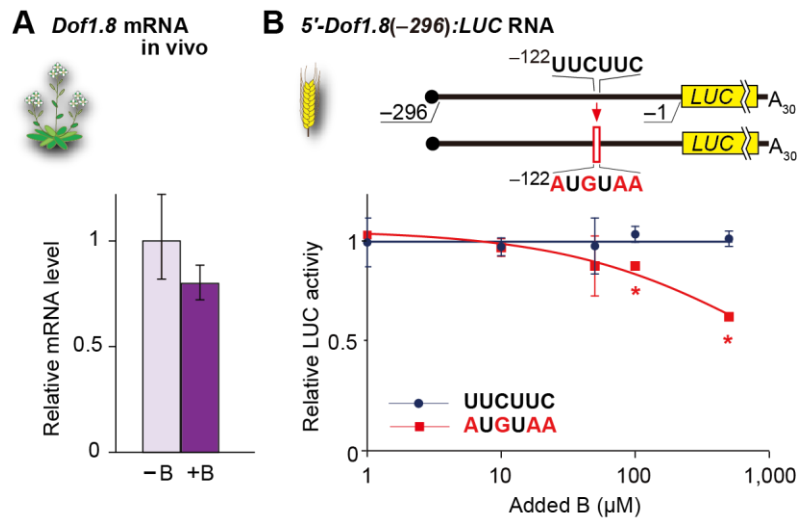

**Supplemental Figure 8. B-Dependent Downregulation Conferred by Introduction of AUG-Stop into *Dof1.8* 5'-UTR.**

**(A)** mRNA accumulation in wild-type roots under 100  $\mu\text{M}$  B (+B) and 0.3  $\mu\text{M}$  B (-B) conditions. Means  $\pm$  SD of relative mRNA accumulation ( $n = 3$ ) are shown.

**(B)** Schematic representation of 5'-*Dof1.8*(-296):LUC RNA and the effect of AUGUAA introduction on the B response. RNA carrying 5'-*Dof1.8*(-296):LUC with or without AUGUAA was translated in WGE in the presence of various B concentrations. Means  $\pm$  SD of relative LUC activities ( $n = 3$ ) are shown. Asterisks indicate significant reduction of reporter activity in RNA having an AUGUAA than that in RNA having the original *Dof1.8* 5'-UTR sequence ( $p < 0.05$ ).



**Supplemental Figure 9 Tendency of Two Codon Combinations to Trigger Ribosome Arrest in 5'-UTRs.**

**(A)** and **(B)** Frequencies of ribosome arrest in each of the combination of two codons (with codon 1 in the P-site and codon 2 in the A-site) were evaluated by investigating ribosome footprint analysis datasets (SRR966474). For each instance of 2 codon combination in 5'-UTRs, the number of reads that start from 15 nt upstream of codon 1, which corresponds to the 5'-end of the ribosome stalled with the A-site on codon 1, was counted and normalized by average read count of the mRNA to cancel the read depth variation caused by different expression levels (designated as Ribosome Arrest Value, RAV). The numbers in **(A)** is the ratio of the instances with RAV greater than two to all instances of the two-codon combinations. The blank cells denote that no instance was found. The distribution of the ratios among all the two-codon combinations ( $64 \times 64 = 4,096$ ) is shown in **(B)**.

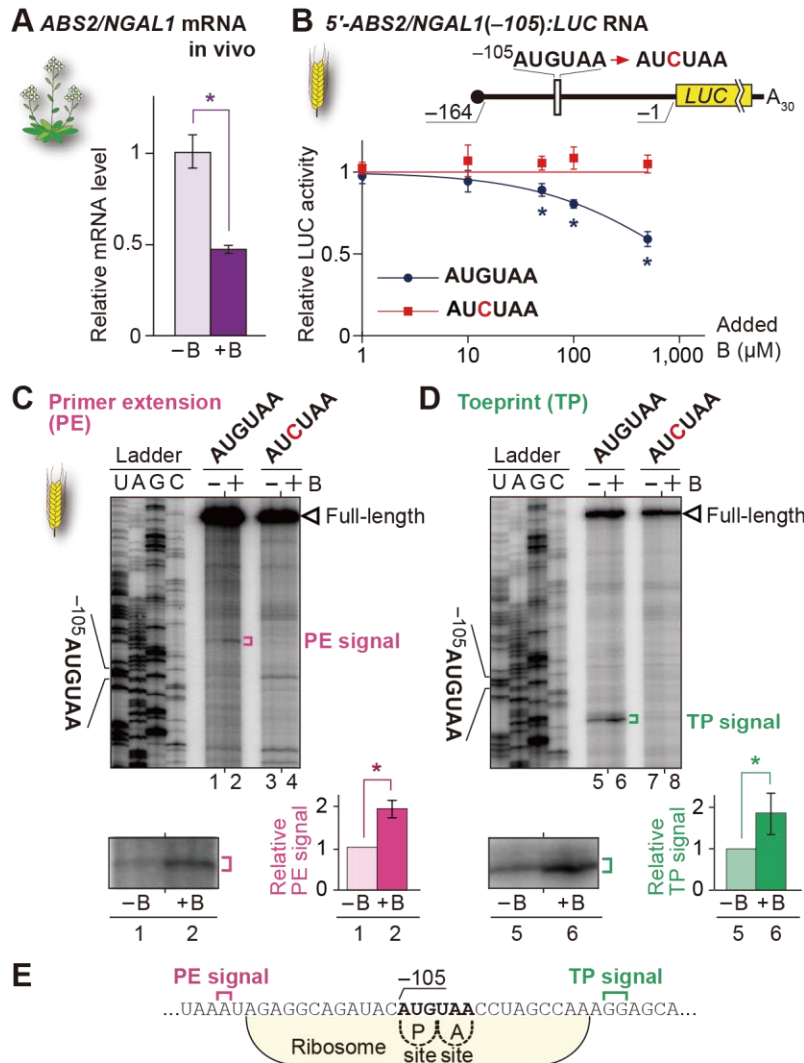

**Supplemental Figure 10. Role of AUG-Stop in B-Dependent Downregulation of *ABS2/NGAL1*.**

**(A)** mRNA accumulation in wild-type roots under 100 μM B (+B) and 0.3 μM B (-B) conditions. Means ± SD of relative mRNA accumulation (n = 3) are shown. An asterisk indicates significant reduction under +B condition (p < 0.05).

**(B)** Schematic representation of 5'-*ABS2/NGAL1(-105):LUC* RNA is shown. RNA carrying 5'-*ABS2/NGAL1:LUC* with or without mutation in AUGUAA was translated in WGE, and means ± SD of relative LUC activities (n = 3) are shown. Asterisks indicate significant reduction of reporter activity with RNA carrying AUGUAA (p < 0.05).

**(C)** and **(D)** Primer extension (PE) **(C)** and toeprint (TP) **(D)** analyses in WGE with 300 μM B (+B) or without B supplementation (-B). Signals are enlarged below the main image of AUGUAA lane, and means ± SD (n = 3) of relative intensities are shown. Asterisks indicate significant difference (p < 0.05).

**(E)** Nucleotide sequence around AUG-stop with positions of PE (magenta) and TP signals (green) are marked. Ribosome occupation of RNA with AUG codon positioned at the P-site is shown.

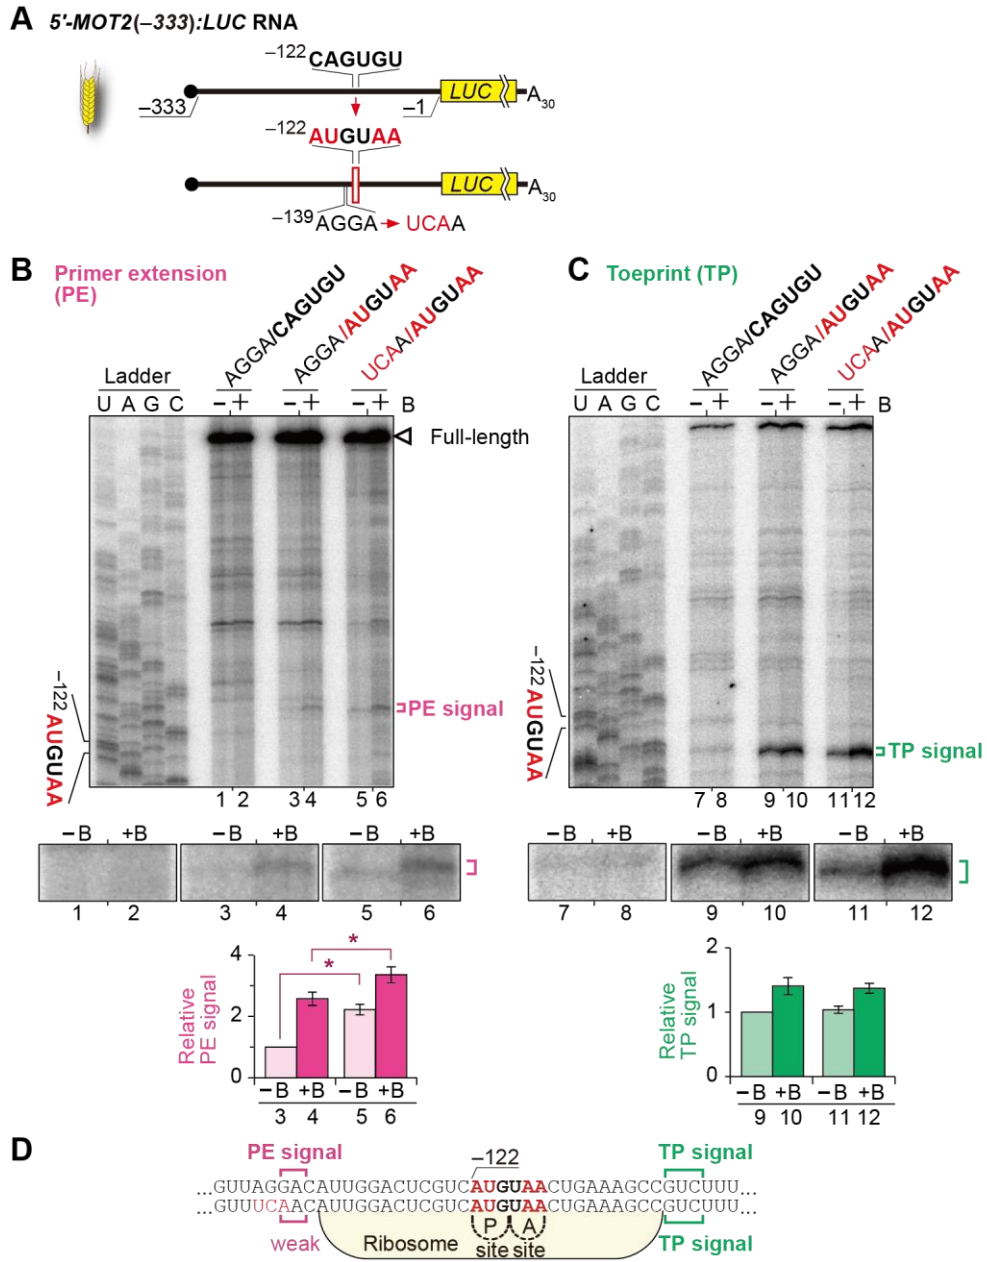

**Supplemental Figure 11. B-Dependent mRNA Degradation Is Enhanced by Introduction of the Upstream Conserved Sequence into *MOT2* 5'-UTR.**

**(A)** Schematic representation of 5'-*MOT2*(-333):*LUC* RNA. Open boxes represent uORFs.

**(B)** and **(C)** RNA carrying 5'-*MOT2*(-333):*LUC* with or without a mutation in AUGUAA or in the region 17–15 nt upstream of <sup>-122</sup>AUG-stop was translated in WGE. Primer extension (PE) **(B)** and toeprint (TP) **(C)** analyses in WGE with 300 μM B (+B) or without B supplementation (-B). Signals are enlarged under the main image, and their relative intensities are shown. Means ± SD are shown (n = 3). Asterisks indicate significant differences (p < 0.05).

**(D)** Nucleotide sequence around <sup>-122</sup>AUG-stop. Positions of PE (magenta) and TP signals (green) are marked. Red letter indicates the introduced mutations. Ribosome occupation of RNA having the AUG codon positioned at the P-site is shown.

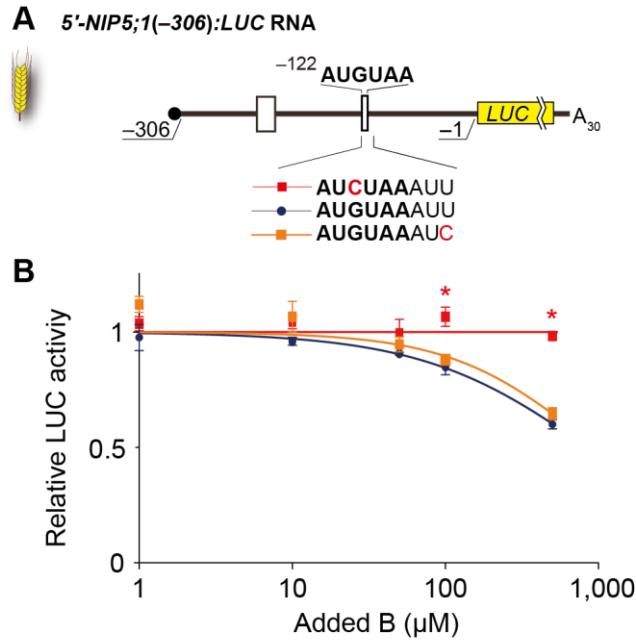

**Supplemental Figure 12. Nine nt Downstream of AUG-Stop Is not Involved in B-Dependent Downregulation in *NIP5;1* 5'-UTR in the In Vitro Translation Assay.**

**(A)** Schematic representations of 5'-*NIP5;1(-306):LUC* RNA and its mutants of <sup>-312</sup>AUGUAA (AUCUAAAUU) or 9 nt downstream of <sup>-312</sup>AUGUAA (AUGUAAAUC). Open boxes represent uORFs.

**(B)** RNAs were used for WGE in vitro translation assays at various B concentrations. Means ± SD of relative LUC activities (n = 3) are shown. Asterisks indicate significant difference of relative reporter activities compared with RNA carrying AUGUAAAUU (p < 0.05).



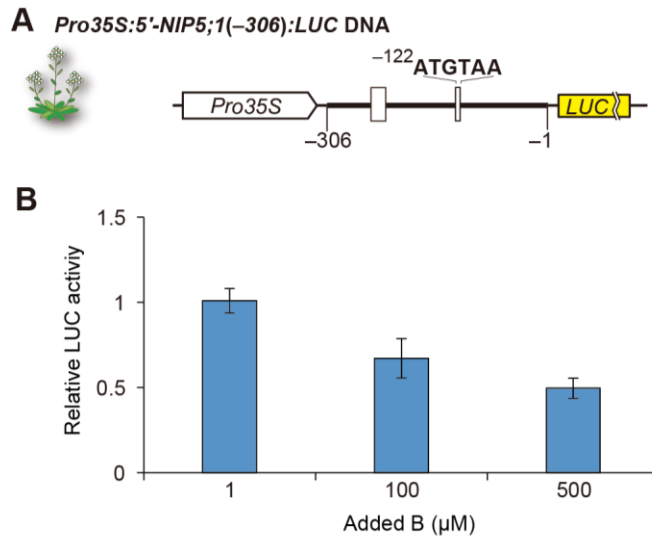

**Supplemental Figure 13. B-Dependent Downregulation of *NIP5;1* under Different B Conditions.**

**(A)** Schematic representation of *35S::5'-NIP5;1(-306):LUC* DNA. Open boxes represent uORFs.

**(B)** Transfection experiments using Arabidopsis cultured cells. Transfected protoplasts were incubated under 500 µM B, 100 µM B or 1 µM B conditions. The LUC activity of each transfected cell extract was normalized with RLUC activity from the co-transfected internal control plasmid and shown as the relative LUC activity. Means ± SD of relative LUC activities are shown (n = 3).

**Supplemental Table 1.** List of B-Responsive Genes Carrying AUG-Stop in Their 5'-UTR.

| AGI code  | Gene name         | Protein description                               | in vivo              |              |                   |
|-----------|-------------------|---------------------------------------------------|----------------------|--------------|-------------------|
|           |                   |                                                   | qRT-PCR <sup>b</sup> | AUGUAA       | AUCUAA            |
| At4g10380 | <i>NIP5;1</i>     | NIP5;1 major intrinsic family protein             | 0.11 ± 0.12*         | 0.43 ± 0.01* | 0.92 ± 0.04       |
| At5g03190 | <i>CPuORF47</i>   | Conserved peptide upstream open reading frame 47  | 0.23 ± 0.03*         | 0.34 ± 0.03* | 0.28 ± 0.06*      |
| At2g36080 | <i>ABS2/NGAL1</i> | AP2/B3-like transcriptional factor family protein | 0.47 ± 0.02*         | 0.58 ± 0.01* | 0.96 ± 0.02       |
| At4g19370 |                   | Protein of unknown function                       | 0.46 ± 0.11*         | 1.03 ± 0.04  | n.t. <sup>c</sup> |
| At4g12420 | <i>SKU5</i>       | Cupredoxin superfamily protein                    | 0.51 ± 0.01*         | 0.64 ± 0.02* | 1.0 ± 0.02        |

<sup>a</sup> In vitro translation assay using RNAs carrying 5'-UTRs with AUG-stop (AUGUAA) sequence or with mutation in AUG-stop (AUCUAA) under 500 μM (+B) or 1 μM (-B) conditions. FC<sub>(+B/-B)</sub> was calculated. Asterisks indicate significant reduction under +B condition (n = 3).

<sup>b</sup> Total RNA was prepared from Col-0 roots that were grown under 100 μM (+B) or 0.3 μM (-B) B conditions for 10 days. qRT-PCR was performed and FC<sub>(+B/-B)</sub> was calculated. Asterisks indicate significant reduction under +B condition (n = 3).

<sup>c</sup> Not tested.

**Supplemental Table 2.** Sequence around the AUG-Stops of B-Responsive Genes.

| Gene ID                               | Gene name         | Sequence around AUG-stop <sup>a</sup>                              | AUG-stop <sup>b</sup>         |
|---------------------------------------|-------------------|--------------------------------------------------------------------|-------------------------------|
| At4g10380                             | <i>NIP5;1</i>     | <u>UU<u>AUAAAA</u>UCUUUCAAAAGC<b>AUGUAA</b>AUUUAAGUCCUAGCUCCAU</u> | <sup>-312</sup> <b>AUGUAA</b> |
|                                       |                   | <u>AUUUAUAAAAUUUCAAAUC<b>AUGUAA</b>AUUUCGUCUCUAUCAUUUU</u>         | <sup>-122</sup> <b>AUGUAA</b> |
| At2g36080                             | <i>ABS2/NGAL1</i> | <u>AU<u>AUAAA</u>UAGAGGCAGAUAC<b>AUGUAA</b>CCUAGCCAAAGGAGCAUUG</u> | <sup>-105</sup> <b>AUGUAA</b> |
| At4g12420                             | <i>SKU5</i>       | <u>CUUUUUCCC<u>GAAUCUUGAUA</u><b>AUGUAA</b>AUUCACAACAAUCUGUUU</u>  | <sup>-104</sup> <b>AUGUAA</b> |
| Os10g36924<br>( <i>Oryza sativa</i> ) | <i>NIP3:1</i>     | <u>UUGAGAAAAGCCUGUGAAGC<b>AUGUAA</b>GAAACACACCAGUUUGUCC</u>        | <sup>-490</sup> <b>AUGUAA</b> |
|                                       |                   | <u>UCU<u>ACAAAA</u>ACCACUAGAUC<b>AUGUAA</b>UUUUCGGCGAAAUCAUCC</u>  | <sup>-314</sup> <b>AUGUAA</b> |
|                                       |                   | <u>UCUGC<u>AAAA</u>GCCAUCAAUC<b>AUGUAA</b>UUAGUAGCUAAAAACCCAU</u>  | <sup>-125</sup> <b>AUGUAA</b> |
| GRMZM2G176209<br>( <i>Zea mays</i> )  | <i>NIP3:1</i>     | <u>UGGAGAAAAGCCUGUGAAGC<b>AUGUAA</b>CUCCAGUCCUGUCCAAAA</u>         | <sup>-526</sup> <b>AUGUAA</b> |
|                                       |                   | <u>UCA<u>ACAAAA</u>GCCUCCGGAUC<b>AUGUAA</b>GUUUCGCCACCAUCAUCUU</u> | <sup>-342</sup> <b>AUGUAA</b> |
|                                       |                   | <u>UCAGC<u>AAAA</u>ACCAUCAAAUC<b>AUGUAA</b>UUAGUGUCUCCCGCGUCC</u>  | <sup>-169</sup> <b>AUGUAA</b> |

<sup>a</sup> AUG-stops are marked with bold letters, the region 12–19 nt upstream of AUG-stop is underlined.

<sup>b</sup> Positions of AUG-stop from the main ORF are shown.

**Supplemental Table 3.** Plasmids Used in This Study and the Primers Used to Construct the Plasmids.

| Plasmid                                                                              | 5'-UTR                       | Mutation                                                                          | Reporter | Origin                                            | Primers <sup>a</sup> |         |
|--------------------------------------------------------------------------------------|------------------------------|-----------------------------------------------------------------------------------|----------|---------------------------------------------------|----------------------|---------|
|                                                                                      |                              |                                                                                   |          |                                                   | Forward              | Reverse |
| Plasmids used for transient assay after transfection in Arabidopsis suspension cells |                              |                                                                                   |          |                                                   |                      |         |
| pMT101                                                                               | <i>NIP5;1</i> (-306)         | <sup>-122</sup> ATGTAA (WT)                                                       | LUC      | this study                                        | MT1f                 | MT12r   |
| pMT104                                                                               | <i>NIP5;1</i> (-306)         | <sup>-122</sup> TTGTAA                                                            | LUC      | this study                                        | MT4f                 | MT15r   |
| pMT105                                                                               | <i>NIP5;1</i> (-306)         | <sup>-122</sup> ATCTAA                                                            | LUC      | this study                                        | MT5f                 | MT16r   |
| pMT107                                                                               | <i>NIP5;1</i> (-306)         | <sup>-122</sup> ATGTAG                                                            | LUC      | this study                                        | MT7f                 | MT18r   |
| pMT108                                                                               | <i>NIP5;1</i> (-306)         | <sup>-122</sup> ATGTGA                                                            | LUC      | this study                                        | MT8f                 | MT19r   |
| pMT109                                                                               | <i>NIP5;1</i> (-306)         | <sup>-122</sup> ATG-1cdn-TAA <sup>b</sup>                                         | LUC      | this study                                        | MT9f                 | MT20r   |
| pMT110                                                                               | <i>NIP5;1</i> (-306)         | <sup>-122</sup> ATG-3cdn-TAA <sup>b</sup>                                         | LUC      | this study                                        | MT10f                | MT21r   |
| pMT141                                                                               | <i>NIP5;1</i> (-306)         | Deletion from -1 to -41                                                           | LUC      | this study                                        | MT1f                 | MT70r   |
| pMT142                                                                               | <i>NIP5;1</i> (-306)         | Deletion from -1 to -65                                                           | LUC      | this study                                        | MT1f                 | MT71r   |
| pMT143                                                                               | <i>NIP5;1</i> (-306)         | Deletion from -1 to -95                                                           | LUC      | this study                                        | MT1f                 | MT72r   |
| pMT148                                                                               | <i>NIP5;1</i> (-306)         | TTC <sup>-122</sup> ATGTAA                                                        | LUC      | this study                                        | MT80f                | MT81r   |
| pMT151                                                                               | <i>NIP5;1</i> (-306)         | <sup>-122</sup> AAGTAA                                                            | LUC      | this study                                        | MT82f                | MT90r   |
| pMT152                                                                               | <i>NIP5;1</i> (-306)         | <sup>-122</sup> ATGGGA                                                            | LUC      | this study                                        | MT83f                | MT91r   |
| pMT153                                                                               | <i>NIP5;1</i> (-306)         | <sup>-122</sup> ATGCAA                                                            | LUC      | this study                                        | MT84f                | MT92r   |
| pMT154                                                                               | <i>NIP5;1</i> (-306)         | <sup>-122</sup> ATGTAC                                                            | LUC      | this study                                        | MT85f                | MT93r   |
| pBI221-LUC+                                                                          | vector sequence              | 'Vector 5'-UTR' (negative control)                                                | LUC      | Matsuo et al., 2001                               |                      |         |
| pKM75                                                                                | vector sequence <sup>c</sup> | (internal control)                                                                | RLUC     | this study                                        | 1832f                | 1801r   |
| Plasmids used for construction of transgenic plants                                  |                              |                                                                                   |          |                                                   |                      |         |
| pMT100                                                                               | <i>NIP5;1</i> (-306)         | <sup>-122</sup> ATGTAA (WT)                                                       | GUS      | P35S <sub>UTR+7</sub> -GUS in Tanaka et al., 2011 |                      |         |
| pMT113                                                                               | <i>NIP5;1</i> (-306)         | <sup>-122</sup> TTGTAA                                                            | GUS      | this study                                        | MT23f                | MT24r   |
| pMT145                                                                               | <i>NIP5;1</i> (-558)         | <sup>-312</sup> ATGTAA <sup>Δ</sup> / <sup>-122</sup> ATGTAA (WT)                 |          | this study                                        | MT26f                | MT35r   |
| pMT146                                                                               | <i>NIP5;1</i> (-558)         | <sup>-312</sup> ATGTAA <sup>Δ</sup> / <sup>-122</sup> ATGTAA <sup>Δ</sup>         |          | this study                                        | MT27f                | MT36r   |
| pMT147                                                                               | <i>NIP5;1</i> (-558)         | <sup>-312</sup> ATGTAA <sup>Δ</sup> / <sup>-139</sup> CCCC <sup>-122</sup> ATGTAA |          | this study                                        | MT73f                | MT74r   |
| pMT155                                                                               | <i>NIP5;1</i> (-306)         | <sup>-122</sup> ATGGGA                                                            | GUS      | this study                                        | MT23f                | MT24r   |
| Plasmids used for transient assay after transfection in HeLa cells                   |                              |                                                                                   |          |                                                   |                      |         |
| pMT139                                                                               | <i>NIP5;1</i> (-231)         | <sup>-122</sup> ATGTAA (WT)                                                       | LUC      | this study                                        | MT68f                | MT69r   |
| pMT140                                                                               | <i>NIP5;1</i> (-231)         | <sup>-122</sup> ATGTAA <sup>Δ</sup>                                               | LUC      | this study                                        | MT68f                | MT69r   |
| pRL-SV40                                                                             | vector sequence              | (internal control)                                                                | RLUC     | Promega                                           |                      |         |
| Plasmids used for in vitro translation                                               |                              |                                                                                   |          |                                                   |                      |         |
| pMT114                                                                               | <i>NIP5;1</i> (-558)         | <sup>-312</sup> ATGTAA <sup>WT</sup> / <sup>-122</sup> ATGTAA <sup>WT</sup> (WT)  | LUC      | this study                                        | MT25f                | MT34r   |
| pMT115                                                                               | <i>NIP5;1</i> (-558)         | <sup>-312</sup> ATGTAA <sup>Δ</sup> / <sup>-122</sup> ATGTAA <sup>WT</sup>        | LUC      | this study                                        | MT26f                | MT35r   |
| pMT116                                                                               | <i>NIP5;1</i> (-558)         | <sup>-312</sup> ATGTAA <sup>Δ</sup> / <sup>-122</sup> ATGTAA <sup>Δ</sup>         | LUC      | this study                                        | MT27f                | MT36r   |
| pMT117                                                                               | <i>NIP5;1</i> (-558)         | <sup>-312</sup> ATGTAA <sup>WT</sup> / <sup>-122</sup> ATGTAA <sup>Δ</sup>        | LUC      | this study                                        | MT27f                | MT36r   |
| pMT125                                                                               | <i>MOT2</i>                  | <sup>-122</sup> CAGTGT (WT)                                                       | LUC      | this study                                        | MT32f                | MT41r   |
| pMT126                                                                               | <i>MOT2</i>                  | <sup>-122</sup> ATGTAA                                                            | LUC      | this study                                        | MT33f                | MT42r   |
| pMT127                                                                               | <i>SKU5</i>                  | <sup>-104</sup> ATGTAA (WT)                                                       | LUC      | this study                                        | MT43f                | MT47r   |
| pMT128                                                                               | <i>SKU5</i>                  | <sup>-104</sup> ATCTAA                                                            | LUC      | this study                                        | MT44f                | MT48r   |
| pMT129                                                                               | <i>ABS2/NGAL1</i>            | <sup>-105</sup> ATGTAA (WT)                                                       | LUC      | this study                                        | MT45f                | MT49r   |
| pMT130                                                                               | <i>ABS2/NGAL1</i>            | <sup>-105</sup> ATCTAA                                                            | LUC      | this study                                        | MT46f                | MT50r   |
| pMT131                                                                               | <i>NIP5;1</i> (-306)         | <sup>-122</sup> ATGTAA (WT)                                                       | LUC      | this study                                        | MT51f                | MT34r   |
| pMT132                                                                               | <i>NIP5;1</i> (-306)         | <sup>-122</sup> ATCTAA                                                            | LUC      | this study                                        | MT51f                | MT34r   |
| pMT144                                                                               | <i>NIP5;1</i> (-306)         | <sup>-139</sup> CCCC                                                              | LUC      | this study                                        | MT73f                | MT74r   |
| pMT156                                                                               | <i>NIP5;1</i> (-306)         | <sup>-122</sup> ATGTAAATC                                                         | LUC      | this study                                        | MT86f                | MT94r   |
| pMT157                                                                               | <i>Dof1.8</i>                | <sup>-122</sup> TTCTTC (WT)                                                       | LUC      | this study                                        | MT87f                | MT95r   |
| pMT158                                                                               | <i>Dof1.8</i>                | <sup>-122</sup> ATGTAA                                                            | LUC      | this study                                        | MT88f                | MT96r   |
| pMT161                                                                               | <i>CPuORF47</i>              | <sup>-288</sup> ATGTAA (WT)                                                       | LUC      | this study                                        | MT52f                | MT59r   |
| pMT162                                                                               | <i>CPuORF47</i>              | <sup>-288</sup> ATCTAA                                                            | LUC      | this study                                        | MT53f                | MT60r   |
| pMT163                                                                               | <i>At4g19370</i>             | <sup>-38</sup> ATGTAA (WT)                                                        | LUC      | this study                                        | MT54f                | MT61r   |
| pMI27                                                                                | vector sequence <sup>d</sup> | (internal control)                                                                | RLUC     | Chiba et al., 2003                                |                      |         |

<sup>a</sup> Primers used for construction. Sequence of the primers are found in Supplemental Table 4.

<sup>b</sup> Actual amino acid sequences are shown in Supplemental Figure 1C.

<sup>c</sup> Modified pBI221 sequence; 5'-ACACGGGGGACTCTAGACC-3'.

<sup>d</sup> pSP64 Poly(A) vector.

**Supplemental Table 4.** Primers Used in This Study.

| Use                                    | Name <sup>a</sup>                      | Sequence (5'-3') | Name <sup>a</sup> | Sequence (5'-3')                                 | Remarks                              |
|----------------------------------------|----------------------------------------|------------------|-------------------|--------------------------------------------------|--------------------------------------|
| Primer extension and toeprint analyses |                                        |                  |                   |                                                  |                                      |
| Primer-1                               | TCGAGGCGTTGGTTCCGATGATC                |                  |                   |                                                  |                                      |
| Primer-2                               | TCGCCAGTACCGGTTCCACCAAAC               |                  |                   |                                                  |                                      |
| ZW4                                    | TCCAGGAACCAGGGCGTA                     |                  |                   |                                                  | Wang and Sachs, 1997                 |
| qRT-PCR analysis                       |                                        |                  |                   |                                                  |                                      |
| NIP5f                                  | CACCGATTTTCCCTCTCCTGAT                 |                  | NIP5r             | GCATGCAGCGTTACCGATTA                             | <i>NIP5;1</i> mRNA                   |
| At4g12420f                             | TCCTCTTGGTGTCCCTCAAC                   |                  | At4g12420r        | CAATGAAGAAGAAGTCCCTCGT                           | <i>SKU5</i> mRNA                     |
| At2g36080f                             | CCGACTCTTATCGCCATGTT                   |                  | At2g36080r        | TCCATGTTCACTCCGAACAG                             | <i>ABS2/NGAL1</i> mRNA               |
| MOT2f                                  | CGCCTTAGGATTGGTTGTG                    |                  | MOT2r             | CTGCGACTCATCACTTGACC                             | <i>MOT2</i> mRNA                     |
| At5g03190f                             | GGGTGAAACCATACCTCCT                    |                  | At5g03190r        | TGCTCCATGATCACCAAAGA                             | <i>CPuORF47</i> mRNA                 |
| At4g19370f                             | CGGTTCTATTGCTCCTGTCC                   |                  | At4g19370r        | TCATCAAGCCATCCTTCTCC                             | <i>At4g19370</i> mRNA                |
| eEF1 $\alpha$ f                        | CCTTGGTGTCAAGCAGATGA                   |                  | eEF1 $\alpha$ r   | TGAGACACCTCCTTGATGATT                            | <i>eEF1 <math>\alpha</math></i> mRNA |
| actin10f                               | GGTAACATTGTGCTCAGTGGTGG                |                  | actin10r          | CTCGGCCTTGAGATCCACATC                            | <i>Actin10</i> mRNA                  |
| ubq10f                                 | GGAGGTGGAGAGTTCTGACA                   |                  | ubq10r            | AGACCAAGTGAAGTGTGGAC                             | <i>Ubq10</i> mRNA                    |
| Plasmid construction <sup>b</sup>      |                                        |                  |                   |                                                  |                                      |
| 1832f                                  | GCTCTAGACCATGGTCATGACTTCGAAAGTTTA      |                  | 1801r             | GAATCAAGAACATTCATTG                              |                                      |
| MT1f                                   | GTTGATCATTAAAGTCCCTAGCTC               |                  | MT12r             | GAGCCTAGGTTCCAACGTTTTTTTTTTTGG                   |                                      |
| MT4f                                   | CAAACTCTGTAAATTCGTCTCTATCAA            |                  | MT15r             | GAGACGAAATTTACAAGATTTGAAATTTTATAAATTTGTG         |                                      |
| MT5f                                   | CAAACTCATCTAAATTCGTCTCTATCAA           |                  | MT16r             | GAGACGAAATTTAGATGATTTGAAATTTTATAAATTTGTG         |                                      |
| MT7f                                   | CAAACTCATGTAGATTTTCGTCTCTATCAA         |                  | MT18r             | GAGACGAAATCTACATGATTTGAAATTTTATAAATTTGTG         |                                      |
| MT8f                                   | CAAACTCATGTGAATTCGTCTCTATCAA           |                  | MT19r             | GAGACGAAATTCACATGATTTGAAATTTTATAAATTTGTG         |                                      |
| MT9f                                   | GATTTAATCGTCTCTATCAATTTATTTTC          |                  | MT20r             | GACGATTAATCATGATTTGAAATTTTATAAATTTGTG            |                                      |
| MT10f                                  | CGTCTAACTATCAATTTATTTCCCTCAC           |                  | MT21r             | GATAGTTAAGACGAAATCATGATTTGAAA                    |                                      |
| MT23f                                  | CACCATTTAAGTCCCTAGCTCCAT               |                  | MT24r             | TTCCAACGTTTTTTTTTTTGG                            |                                      |
| MT25f                                  | GTGCTAGACATAAGCTCAAAGACTAACCA          |                  | MT34r             | GAGCCATGGCCAACGTTTTTTTTTTTGGT                    |                                      |
| MT26f                                  | GCTTTATAAAAATCATTTAAGTCCCTAGCTCCATTTTC |                  | MT35r             | CTAGGACTTAAATGATTTTTATAAAGCTGTTACTACG            |                                      |
| MT27f                                  | ACAAATTTATAAAAACGTCTCTATCAATT          |                  | MT36r             | TAAATGATAGAGACGTTTTTATAAATTT                     |                                      |
| MT32f                                  | GTTTCTAGAGAGTTATAAACAATACAACACTG       |                  | MT41r             | GAGCCATGGGATTGGATCTAAAGTCAAAGC                   |                                      |
| MT33f                                  | ACTCGTCATGTAAGTAAAAGCCGTCTTTTATCC      |                  | MT42r             | CTTTTCAGTTACATGACGAGTCCAATGTCCTAAC               |                                      |
| MT43f                                  | TGCTCTAGATAGCCGTTCTCTTATGTCTATA        |                  | MT47r             | CTGTCCATGGTTTCTTTTTTCTCTCGCA                     |                                      |
| MT44f                                  | GATAATCTAAATTCACAACAAATCT              |                  | MT48r             | ATTTAGATTATCAAGATTCGGGAAAAAG                     |                                      |
| MT45f                                  | TGCTCTAGAAAGATAAATTTCTCTTTCTT          |                  | MT49r             | CTGTCCATGGTTGAAAGAGAGGGAGAGAGA                   |                                      |
| MT46f                                  | ATACATCTAACCTAGCCAAAGGAGCAT            |                  | MT50r             | AGGTTAGATGTATCTGCCTCTATTTAT                      |                                      |
| MT51f                                  | GTGCTAGAAATTTAAGTCCCTAGCTCCAT          |                  | MT59r             | CTGTCCATGGTGATTTCTTCAAATACTTCA                   |                                      |
| MT52f                                  | TGCTCTAGACTCTTCTTCCCAAAAAAAA           |                  | MT60r             | TCTTAGATGCTTGTAAGAAATCTAAAAG                     |                                      |
| MT53f                                  | GAGCATCTAAGACGAGATTTTGTTC              |                  | MT61r             | CTGTCCATGGAGTTTTTGTGGACAAAATC                    |                                      |
| MT54f                                  | TGCTCTAGAACCTCACATAGTCACATATC          |                  | MT69r             | CCCAGCCTTGGGCCAACGTTTTTTTTTTTGGTTTTTTTTTTTGG     |                                      |
| MT68f                                  | CCCAGCCTTAGTTTCTCAATTTATTGATCT         |                  | MT70r             | TATCCTAGGTAAATAAAAAGTACTAAATTTCTAATTTTTTTTTTTTGG |                                      |
| MT73f                                  | ACACAAATTTCCCAAAATTTCAAATCATGTAAT      |                  | MT71r             | GCGCCTAGGTTTTTTTTTTGTTTTTTTTTTGGTGAGGGGA         |                                      |
| MT78f                                  | TAAAGTCGACAAAAATCAAGCCACTAACACG        |                  | MT72r             | GAGCCTAGGAATAAATGATAGAGACGAAATTTAC               |                                      |
| MT80f                                  | ATTTCAATTCATGAAATTTTCGTCTCTA           |                  | MT74r             | TTGAAATTTTGGGAATTTGTGTTTACACTTGTG                |                                      |
| MT82f                                  | CAAACTCAAGTAAATTTTCGTCTCTATCAA         |                  | MT79r             | TAAAGTCGACACAACACATTACACATGCCATA                 |                                      |
| MT83f                                  | CATGGGAATTTTCGTCTCTATCAATTTAT          |                  | MT81r             | CGAAATTTACATGAATTTGAAATTTTATAAATTTGTGTTTAC       |                                      |
| MT84f                                  | CAAACTCATGCAATTTTCGTCTCTATCAA          |                  | MT90r             | GAGACGAAATTTACTTGATTTGAAATTTTATAAATTTGTG         |                                      |
| MT85f                                  | CATGTACATTTTCGTCTCTATC                 |                  | MT91r             | GAGACGAAATTTCCCATGATTTGAAATTTTATAAATTTGTG        |                                      |
| MT86f                                  | TCATGTAATCTCGTCTCTATC                  |                  | MT92r             | GAGACGAAATTTGCATGATTTGAAATTTTATAAATTTGTG         |                                      |
| MT87f                                  | TGCTCTAGAAAGTTCAGAGTGTGTGAGAGTCA       |                  | MT93r             | GATAGAGACGAAATGTACATGA                           |                                      |
| MT88f                                  | TTTTTTCGTCTGTAATTTGCTTTTTTCAAAAACCCAG  |                  | MT94r             | GATAGAGACGAGATTTACATGA                           |                                      |
|                                        |                                        |                  | MT95r             | CATGCCATGGGCTATGAAATTTGCAG                       |                                      |
|                                        |                                        |                  | MT96r             | GA AAAAGCAATTACATGACGAAAAAGAGAATTTAAACA          |                                      |

<sup>a</sup> For qRT-PCR analysis and plasmid construction, forward and reverse primers are marked with a suffix "f" and "r", respectively.

<sup>b</sup> Restriction sites used for cloning the PCR-amplified fragments are underlined.

**Supplemental Table 5.** Relative *NIP5;1* mRNA Levels Obtained by Using Different Reference Genes.

| Reference gene | Relative <i>NIP5;1</i> mRNA level <sup>a</sup> ± SD |            |
|----------------|-----------------------------------------------------|------------|
|                | +B                                                  | -B         |
| <i>eEF1α</i>   | 1.0 ± 0.1                                           | 34.3 ± 6.9 |
| <i>Actin10</i> | 1.0 ± 0.1                                           | 33.1 ± 4.6 |
| <i>Ubq10</i>   | 1.0 ± 0.1                                           | 36.4 ± 3.7 |

<sup>a</sup> qRT-PCR was performed with total RNA prepared from Col-0 roots that were grown under 100 μM (+B) or 0.3 μM (-B) conditions for 10 days (n = 3).
